# Supplementary material for: Comparative Metatranscriptomics of Wheat Rhizosphere Microbiomes in Disease Suppressive and Non-suppressive Soils for Rhizoctonia solani AG8
Source: PubMed Central journal article supplement (PMC5945926; doi:10.3389/fmicb.2018.00859), 2018-05-04
Supplement: Image_2.pdf [file Image_2.pdf]

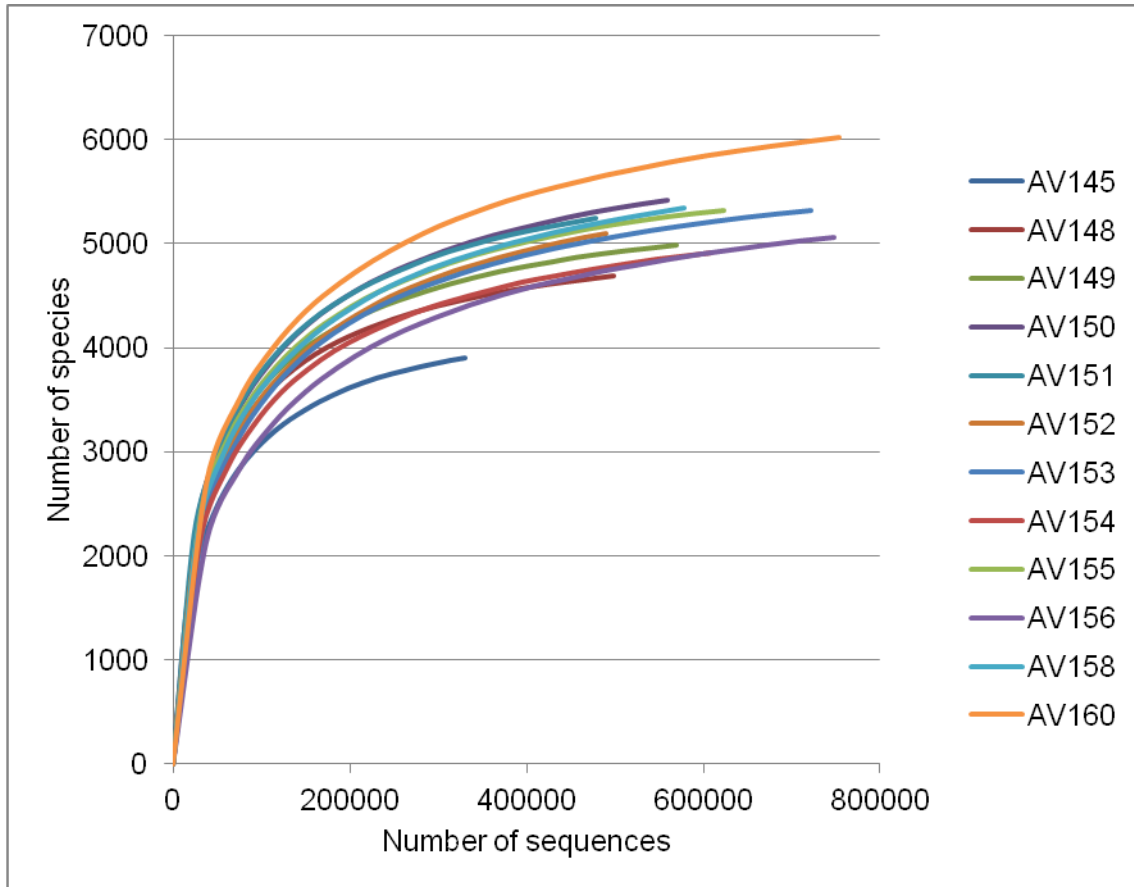

**FIGURE S2.** Rarefaction curves for mRNA sequences from suppressive (AV145-AV152) and non-suppressive (AV153-AV160) samples assigned at species level on the basis of NCBI taxonomy and lowest common ancestor hierarchy in MEGAN.
