# Supplementary material for: Comparative Metatranscriptomics of Wheat Rhizosphere Microbiomes in Disease Suppressive and Non-suppressive Soils for Rhizoctonia solani AG8
Source: PubMed Central journal article supplement (PMC5945926; doi:10.3389/fmicb.2018.00859), 2018-05-04
Supplement: Image_3.pdf [file Image_3.pdf]

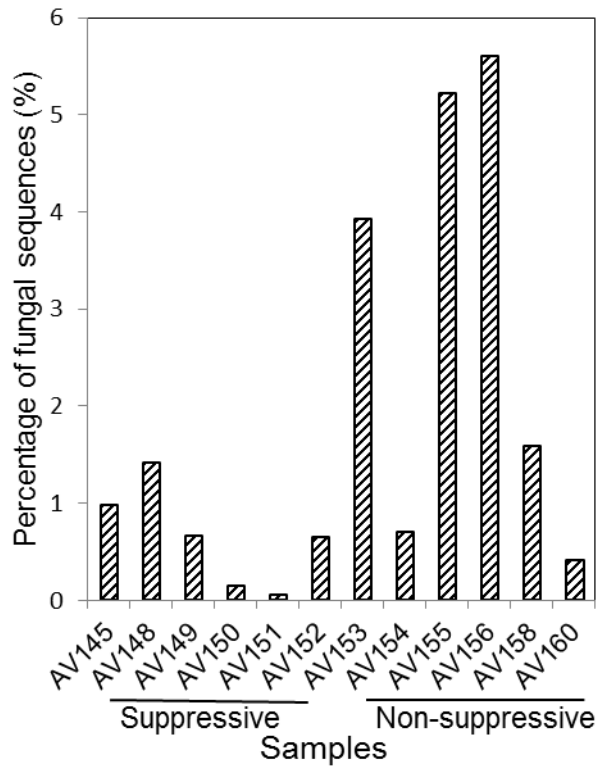

**FIGURE S3.** Relative abundance of *R. solani* AG8 sequences in fungal transcripts of metatranscriptomic libraries from the rhizosphere of wheat in suppressive (AV145-AV152) and non-suppressive (AV153-AV160) soil.
