# Supplementary material for: Comparative Metatranscriptomics of Wheat Rhizosphere Microbiomes in Disease Suppressive and Non-suppressive Soils for Rhizoctonia solani AG8
Source: PubMed Central journal article supplement (PMC5945926; doi:10.3389/fmicb.2018.00859), 2018-05-04
Supplement: Image_4.pdf [file Image_4.pdf]

A

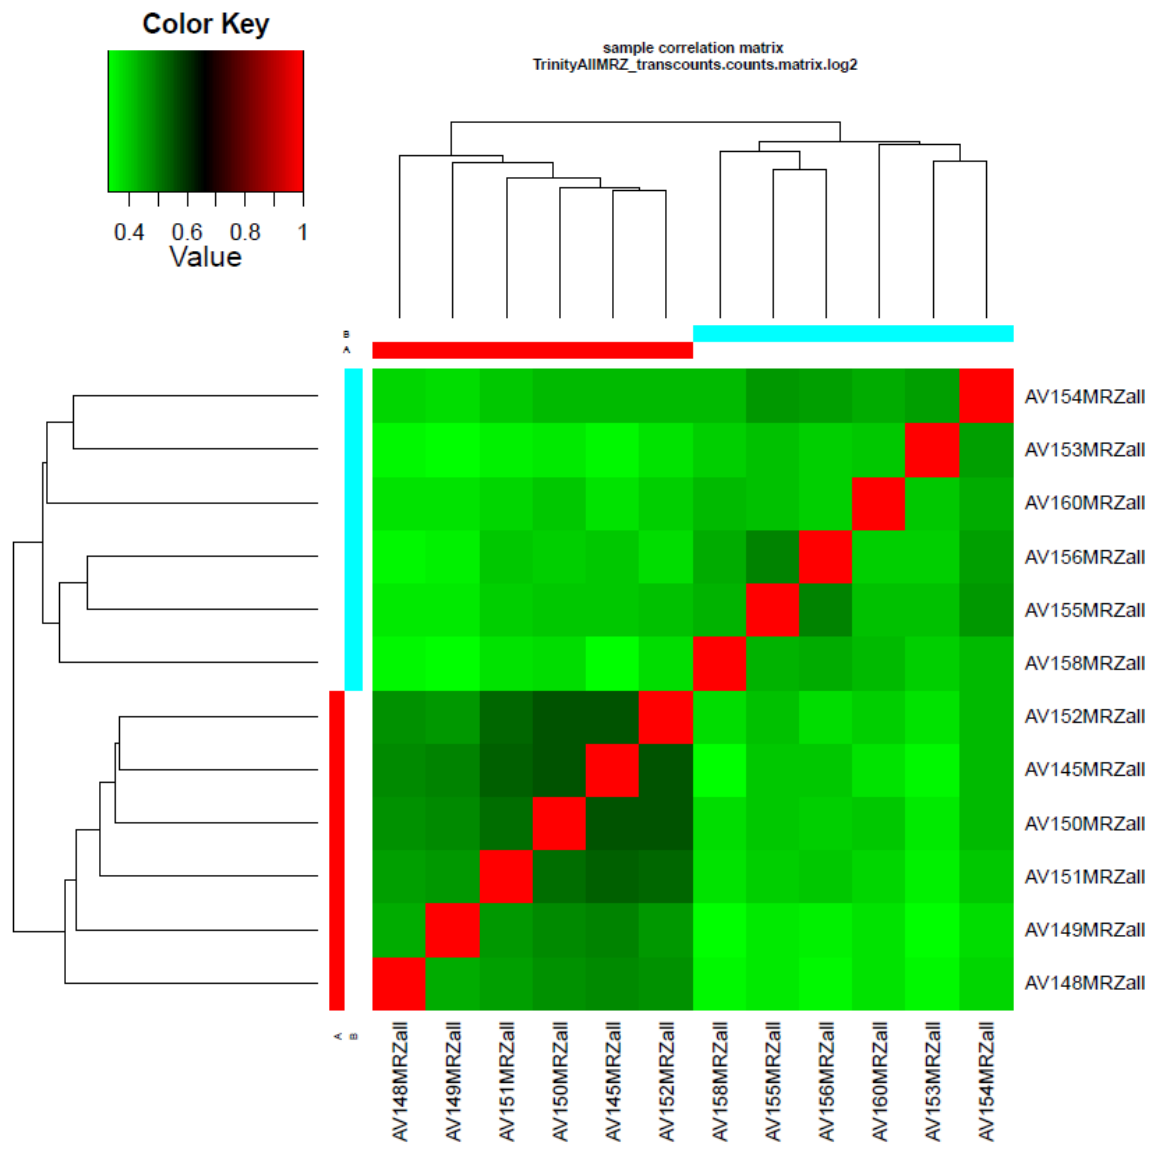

**B**

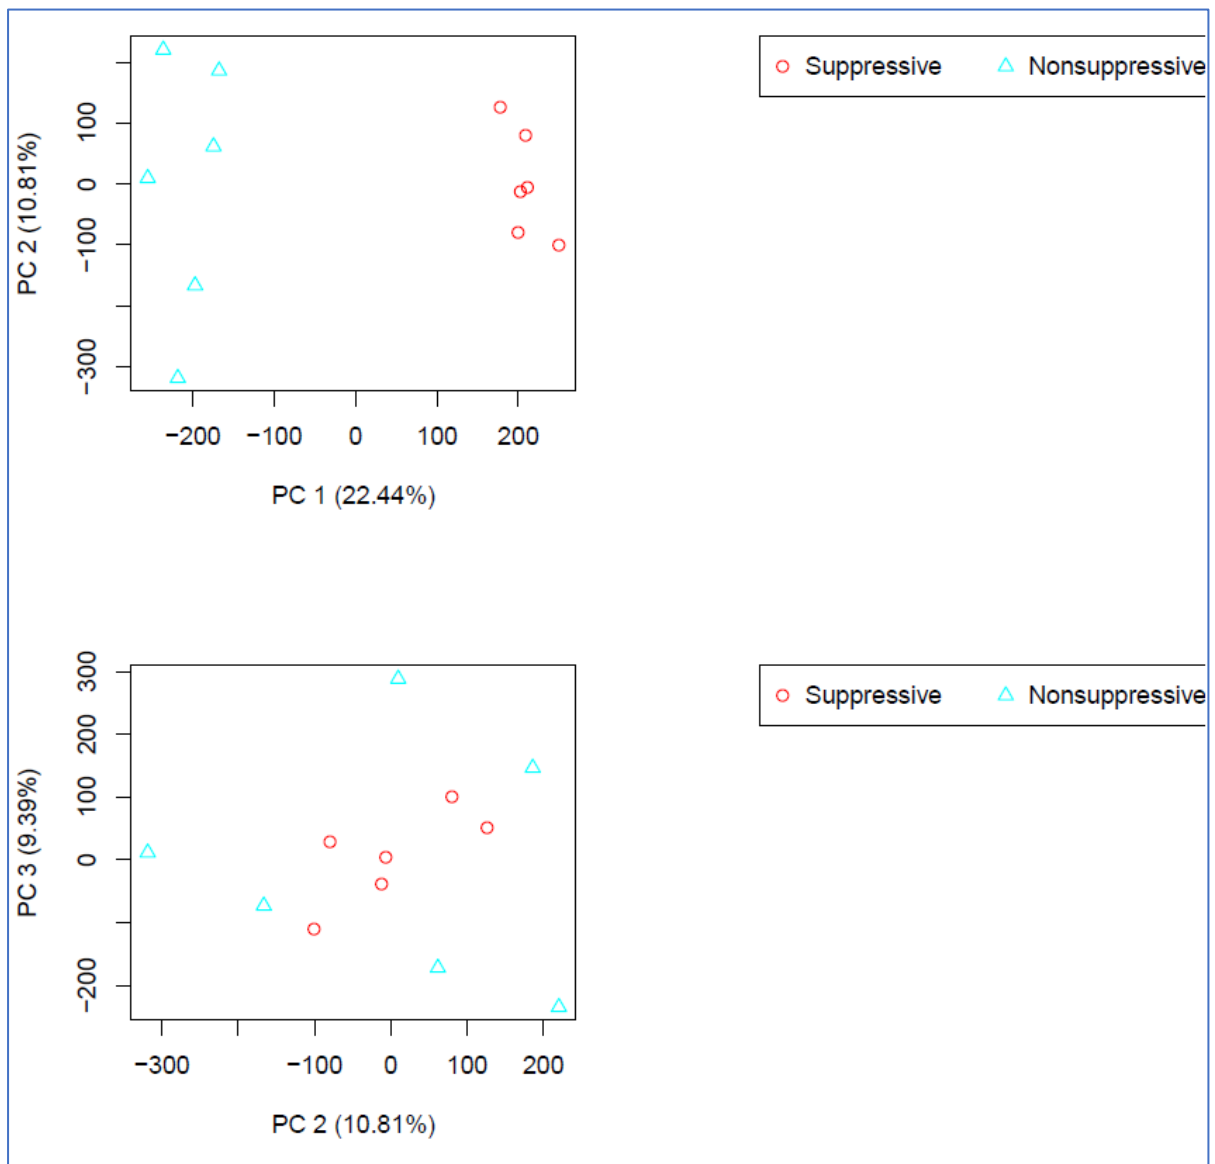

**FIGURE S4.** The similarity of biological replicate metatranscriptomes from the suppressive (AV145MRZall-AV152MRZall) and non-suppressive (AV153MRZall-AV160MRZall) field was examined by **A**) a Pearson correlation heatmap based on transcript expression values. Replicates are highly similarly when they are closer to a value of 1; and **B**) a principal component analysis (PCA) plot.
